# Supplementary material for: Allelic Diversification of the Wx and ALK Loci in Indica Restorer Lines and Their Utilisation in Hybrid Rice Breeding in China over the Last 50 Years
Source: MDPI journal article supplement (doi:10.3390/ijms23115941), 2022-05-25
Supplement: s1 [file s1]

## Supplementary Figures

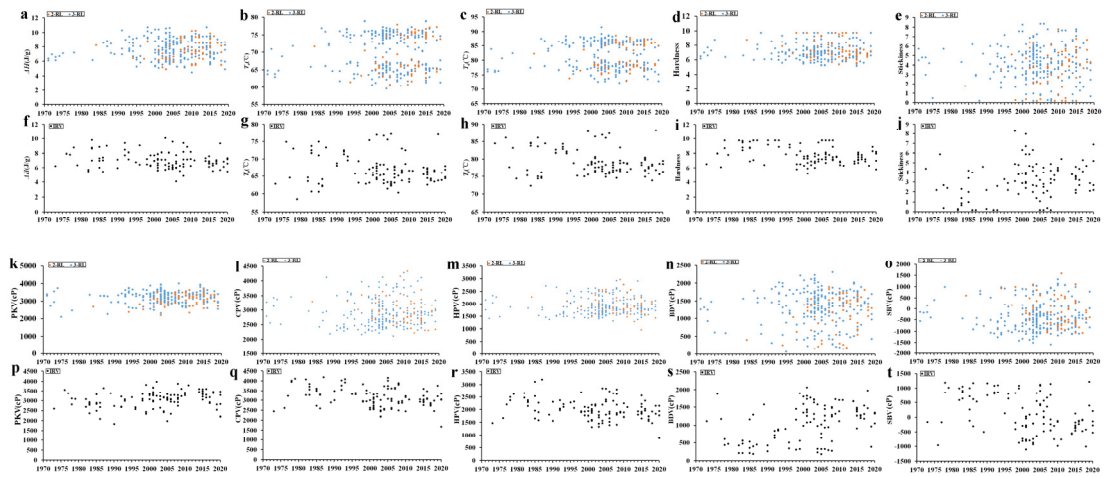

**Figure S1.** Phenotypic data for rice breeding distributions. **(a, b, c, d, e, k, l, m, n, o)** 2-RL and 3-RLs. **(f, g, h, i, j, p, q, r, s, t)** IRVs. **(a, f)** Enthalpy of gelatinisation. **(b, g)** Onset temperature of gelatinisation. **(c, h)** Terminating temperature of gelatinisation. **(d, i)** Hardness. **(e, j)** Stickiness. **(k, p)** Peak paste viscosity. **(l, q)** Cool paste viscosity. **(m, r)** Hot paste viscosity. **(n, s)** Breakdown value. **(o, t)** Setback value.

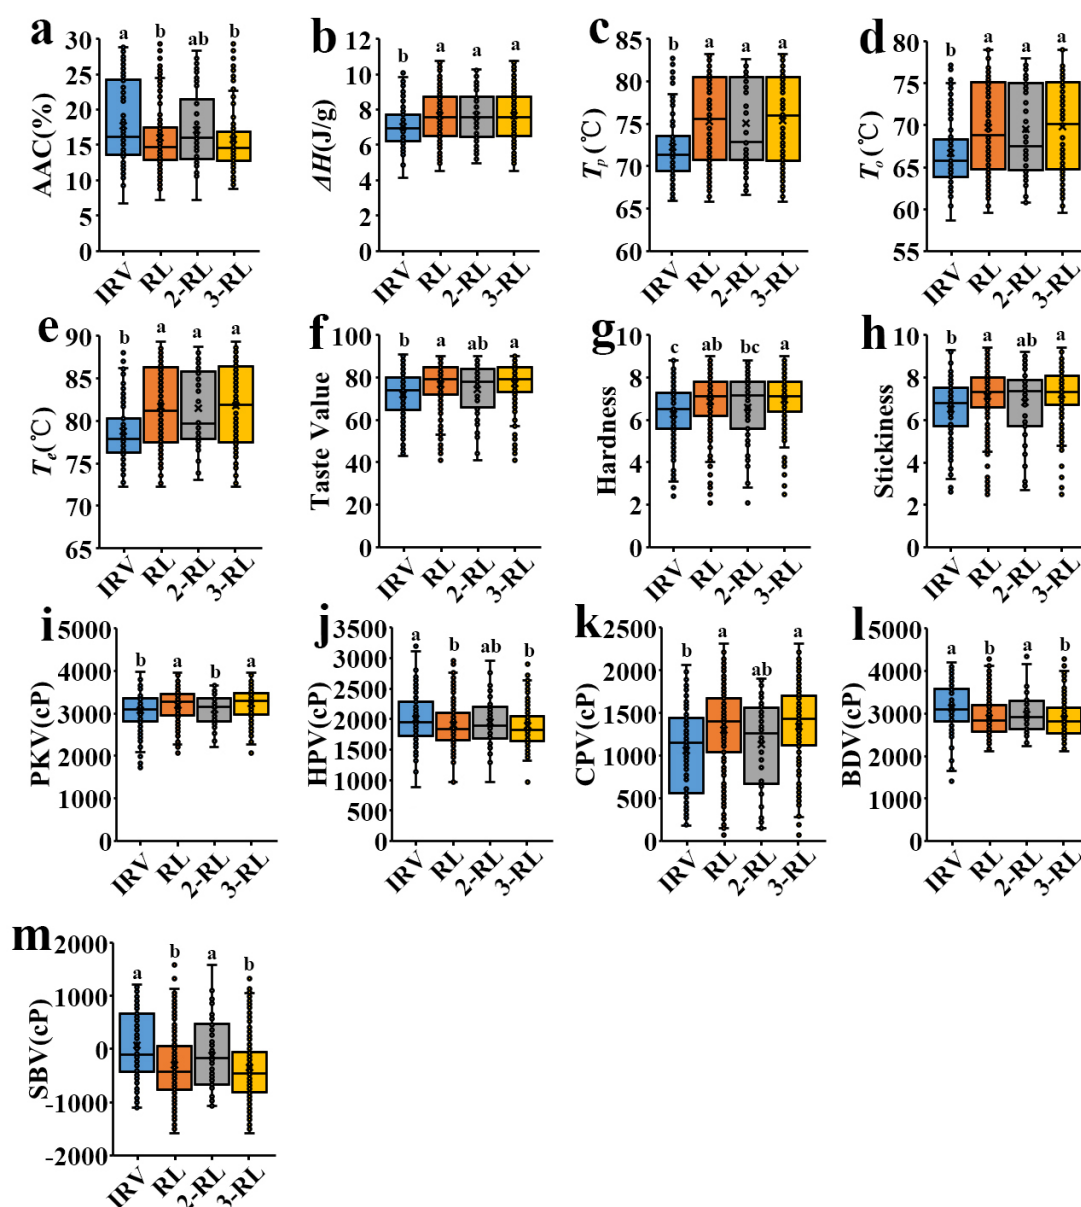

**Figure S2.** Phenotypic data for IRVs, 2-RLs and 3-RLs. **(a)** Apparent amylose content. **(b)** Enthalpy of gelatinisation. **(c)** Peak temperature of gelatinisation. **(d)** Onset temperature of gelatinisation. **(e)** Terminating temperature of gelatinisation. **(f)** Taste value. **(g)** Hardness. **(h)** Stickiness. **(i)** Peak paste viscosity. **(j)** Hot paste viscosity. **(k)** Cool paste viscosity. **(l)** Breakdown value. **(m)** Setback value. One-way ANOVA, different letters represent significant differences ( $p < 0.05$ ).

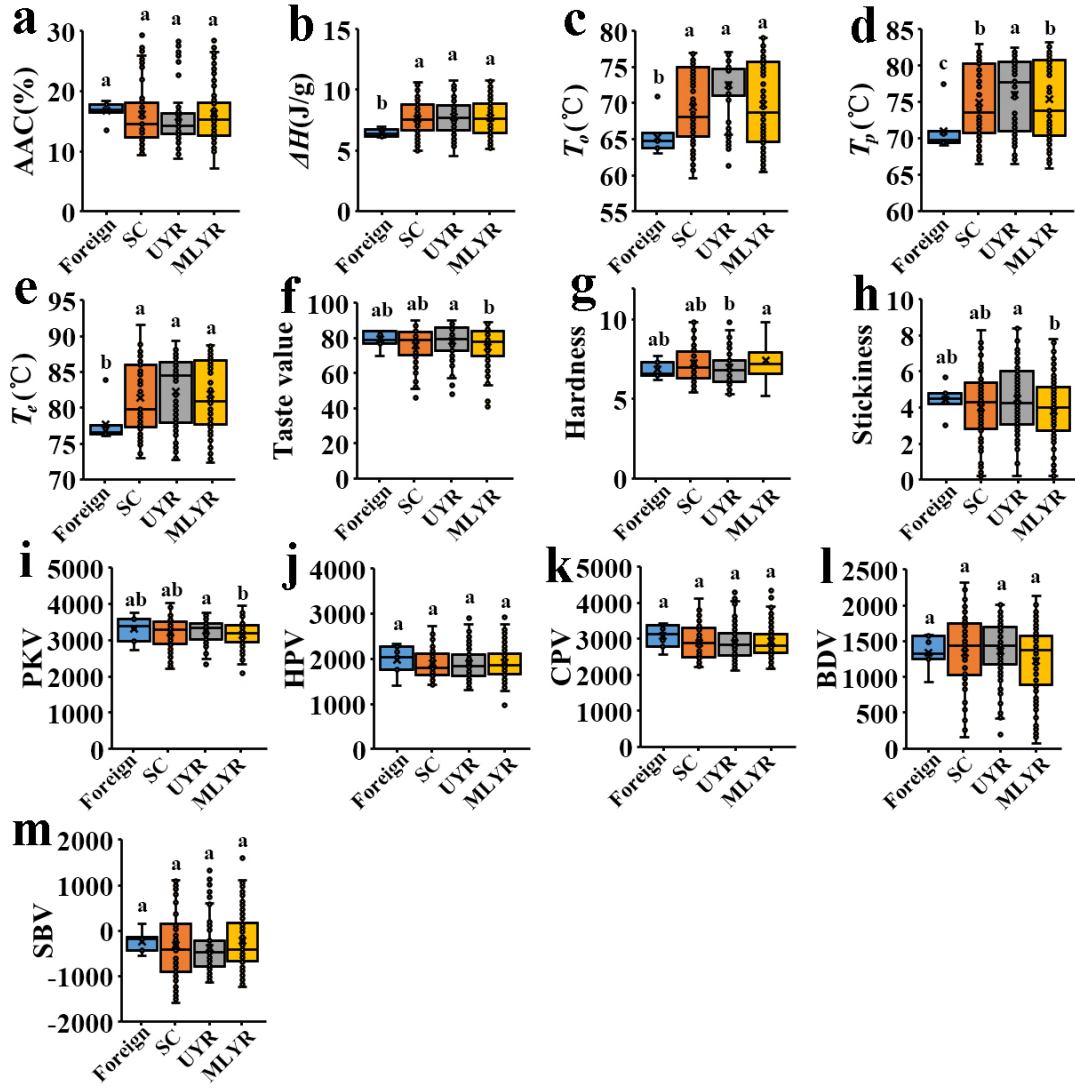

**Figure S3.** Phenotypic data for different areas. **(a)** Apparent amylose content. **(b)** Enthalpy of gelatinisation **(c)** Peak temperature of gelatinisation. **(d)** Onset temperature of gelatinisation. **(e)** Terminating temperature of gelatinisation. **(f)** Taste value. **(g)** Hardness. **(h)** Stickiness. **(i)** Peak paste viscosity. **(j)** Hot paste viscosity. **(k)** Cool paste viscosity. **(l)** Breakdown value. **(m)** Setback value. One-way ANOVA, different letters represent significant differences ( $p < 0.05$ ).



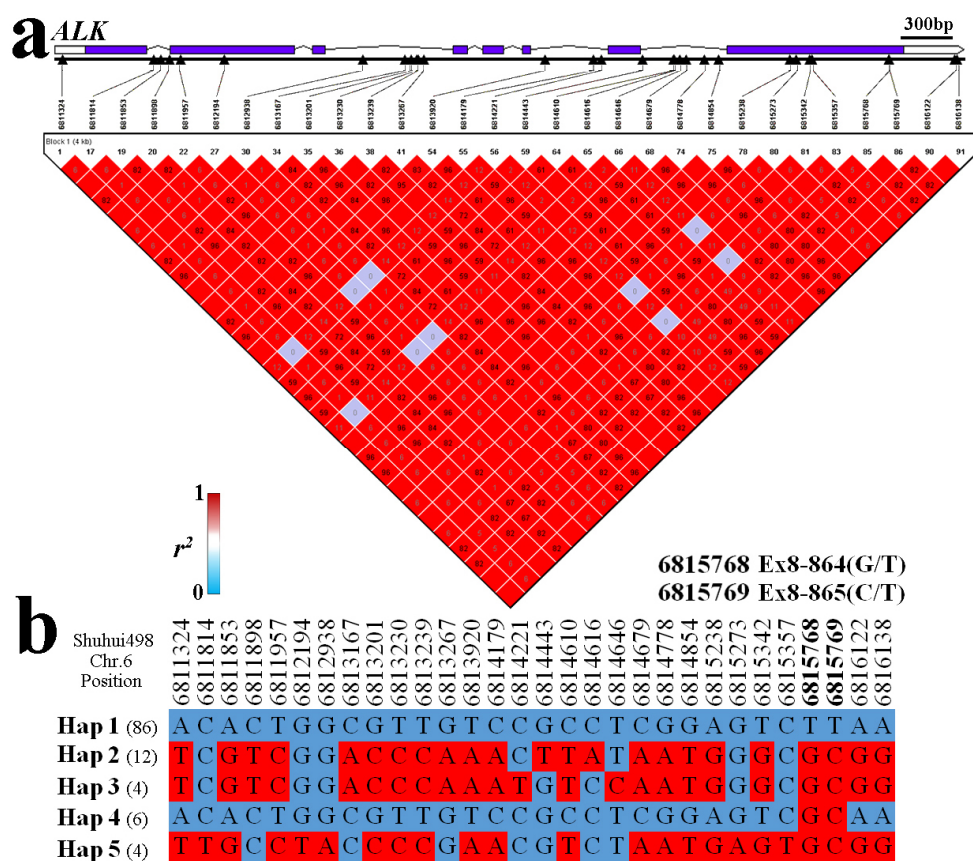

**Figure S5.** Analysis of haplotypes of *ALK* in IRVs. **(a)** Linkage disequilibrium (LD) analysis. The  $r^2$  value is shown on the matrix diagram. **(b)** Haplotype analysis.

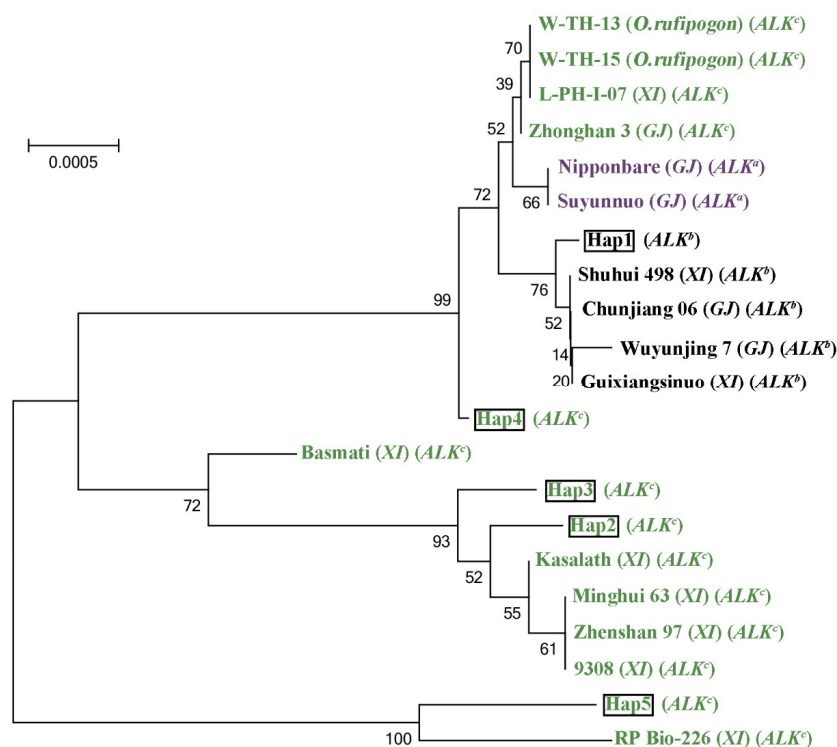

**Figure S6.** Clustering analysis of different rice varieties  $ALK$ .

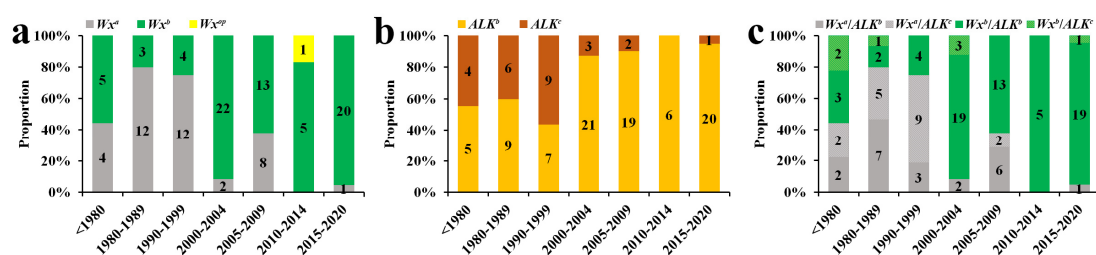

**Figure S7.** Frequency distribution of different rice materials based on different alleles. (a) *Waxy*. (b)  $ALK$ . (c) Combination of *Wx* and  $ALK$ .

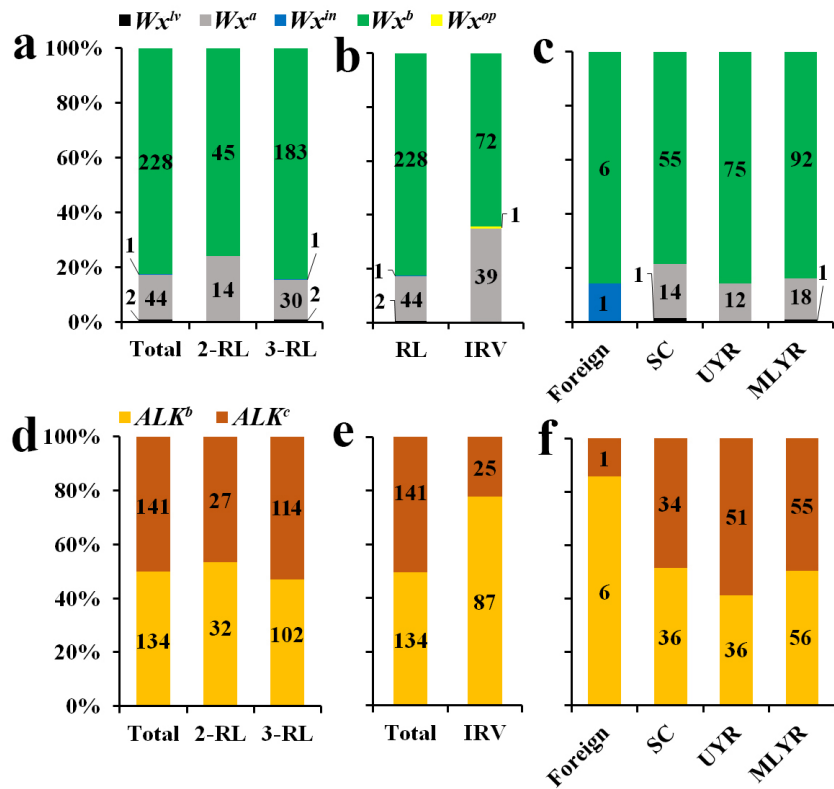

**Figure S8.** Frequency distribution of different rice materials based on different alleles of different types and areas. (a, b, c) *Waxy*. (d, e, f) *ALK*.

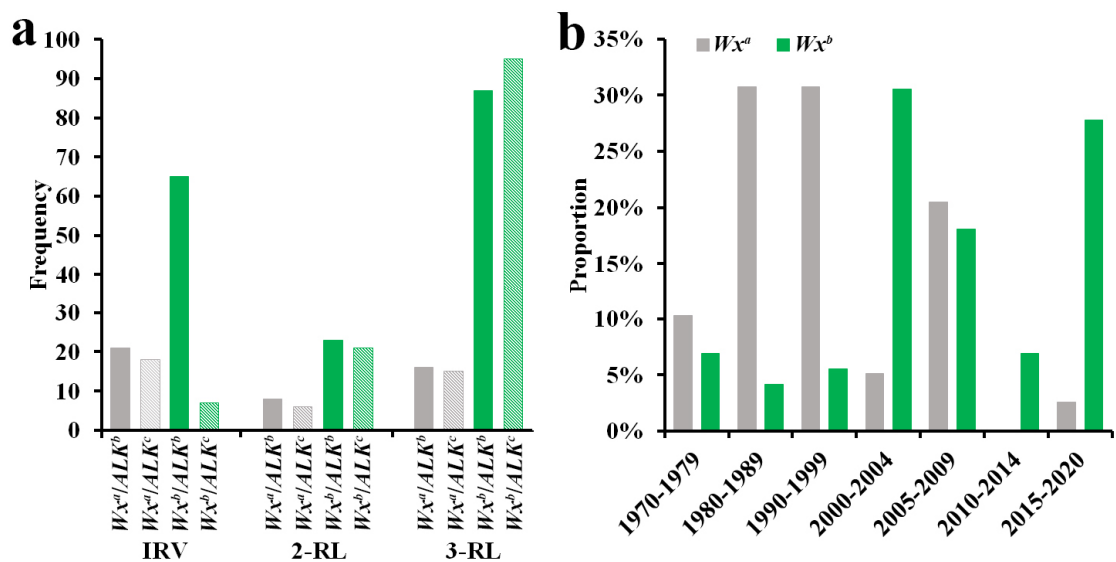

**Figure S9.** Combined analysis of *Waxy* and *ALK*. (a) Frequency distribution of different combinations. (b) Distribution of  $Wx^a$  and  $Wx^b$  at different breeding times.



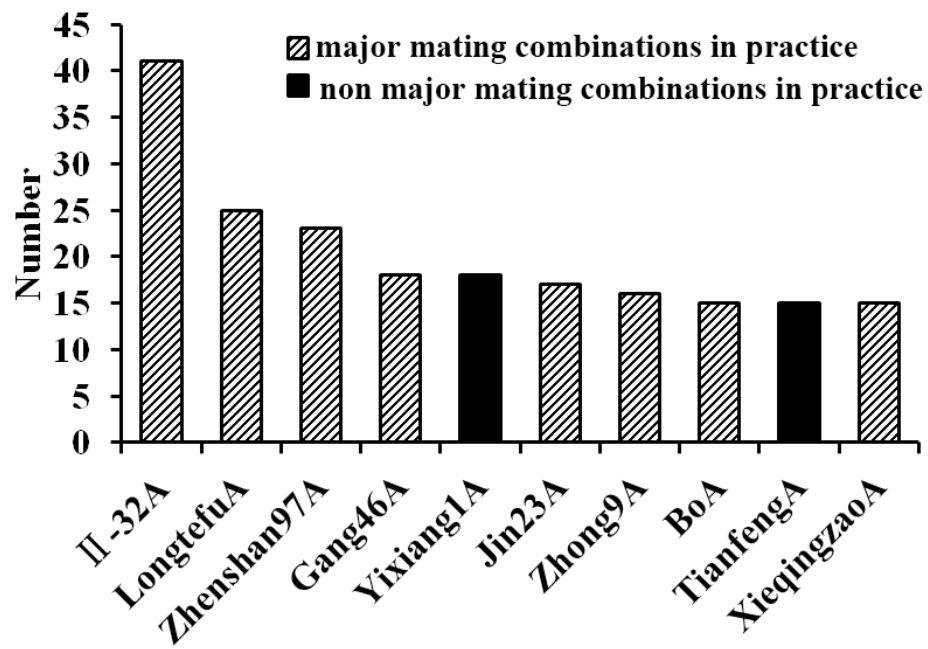

**Figure S10.** Female plants matching RLs in this experiment based on statistics or sterile lines.



## Supplementary Tables

**Table S2. Correlation analysis**

| 0              | AAC      | $\Delta H$ | $T_0$    | $T_p$    | $T_e$    | Taste<br>value | Hardness | Stickiness | PKV      | HPV      | DBV      | CPV     |
|----------------|----------|------------|----------|----------|----------|----------------|----------|------------|----------|----------|----------|---------|
| $\Delta H$     | -0.242   |            |          |          |          |                |          |            |          |          |          |         |
| $T_0$          | -0.273   | 0.830**    |          |          |          |                |          |            |          |          |          |         |
| $T_p$          | -0.301** | 0.819**    | 0.978**  |          |          |                |          |            |          |          |          |         |
| $T_e$          | -0.288   | 0.807**    | 0.958**  | 0.985**  |          |                |          |            |          |          |          |         |
| Taste<br>value | -0.515** | 0.180      | 0.195    | 0.219    | 0.232    |                |          |            |          |          |          |         |
| Hardness       | 0.624**  | -0.179     | -0.219   | -0.249   | -0.249   | -0.904**       |          |            |          |          |          |         |
| Stickiness     | -0.461** | 0.129      | 0.136    | 0.159    | 0.175    | 0.920**        | -0.929** |            |          |          |          |         |
| PKV            | -0.536** | 0.261      | 0.296    | 0.290    | 0.262    | 0.406**        | -0.487** | 0.403**    |          |          |          |         |
| HPV            | 0.553**  | -0.354**   | -0.430** | -0.457** | -0.457** | -0.475**       | 0.503**  | -0.394**   | -0.054   |          |          |         |
| DBV            | -0.769** | 0.420**    | 0.502**  | 0.517**  | 0.498**  | 0.610**        | -0.682** | 0.545**    | 0.720**  | -0.710** |          |         |
| CPV            | 0.692**  | -0.407**   | -0.462** | -0.495** | -0.488** | -0.527**       | 0.588**  | -0.465**   | -0.255   | 0.890**  | -0.801** |         |
| SBV            | 0.788**  | -0.433**   | -0.491** | -0.511** | -0.492** | -0.592**       | 0.679**  | -0.546**   | -0.720** | 0.668**  | -0.962** | 0.855** |

Student's *t* test, significantly different at \**p* < 0.05, \*\**p* < 0.01.

**Table S3. Genetic distance between different materials**

|               | 9308    | Minghui63 | RP-Bio-226 | Zhonghan3 | Nipponbare | Shuhui498 | Chunjiang06 | W-TH-13 | Suyunuo | Basmati | Guixiangsinuo | W-TH-15 | Wuyunjing7 | Kasalath | L-PH-I-07 | Zhenshan97 | Hap1    | Hap2    | Hap3    | Hap4    |
|---------------|---------|-----------|------------|-----------|------------|-----------|-------------|---------|---------|---------|---------------|---------|------------|----------|-----------|------------|---------|---------|---------|---------|
| Minghui63     | 0.00000 |           |            |           |            |           |             |         |         |         |               |         |            |          |           |            |         |         |         |         |
| RP-Bio-226    | 0.00564 | 0.00564   |            |           |            |           |             |         |         |         |               |         |            |          |           |            |         |         |         |         |
| Zhonghan3     | 0.00504 | 0.00504   | 0.00585    |           |            |           |             |         |         |         |               |         |            |          |           |            |         |         |         |         |
| Nipponbare    | 0.00524 | 0.00524   | 0.00605    | 0.00020   |            |           |             |         |         |         |               |         |            |          |           |            |         |         |         |         |
| Shuhui498     | 0.00544 | 0.00544   | 0.00625    | 0.00040   | 0.00060    |           |             |         |         |         |               |         |            |          |           |            |         |         |         |         |
| Chunjiang06   | 0.00544 | 0.00544   | 0.00625    | 0.00040   | 0.00060    | 0.00000   |             |         |         |         |               |         |            |          |           |            |         |         |         |         |
| W-TH-13       | 0.00582 | 0.00582   | 0.00670    | 0.00000   | 0.00029    | 0.00058   | 0.00058     |         |         |         |               |         |            |          |           |            |         |         |         |         |
| Suyunuo       | 0.00524 | 0.00524   | 0.00605    | 0.00020   | 0.00000    | 0.00060   | 0.00060     | 0.00029 |         |         |               |         |            |          |           |            |         |         |         |         |
| Basmati       | 0.00231 | 0.00231   | 0.00551    | 0.00347   | 0.00376    | 0.00405   | 0.00405     | 0.00349 | 0.00376 |         |               |         |            |          |           |            |         |         |         |         |
| Guixiangsinuo | 0.00544 | 0.00544   | 0.00625    | 0.00040   | 0.00060    | 0.00000   | 0.00000     | 0.00058 | 0.00060 | 0.00405 |               |         |            |          |           |            |         |         |         |         |
| W-TH-15       | 0.00580 | 0.00580   | 0.00668    | 0.00000   | 0.00029    | 0.00058   | 0.00058     | 0.00000 | 0.00029 | 0.00348 | 0.00058       |         |            |          |           |            |         |         |         |         |
| Wuyunjing7    | 0.00564 | 0.00564   | 0.00646    | 0.00060   | 0.00080    | 0.00020   | 0.00020     | 0.00087 | 0.00080 | 0.00434 | 0.00020       | 0.00087 |            |          |           |            |         |         |         |         |
| Kasalath      | 0.00020 | 0.00020   | 0.00544    | 0.00483   | 0.00504    | 0.00524   | 0.00524     | 0.00553 | 0.00504 | 0.00202 | 0.00524       | 0.00551 | 0.00544    |          |           |            |         |         |         |         |
| L-PH-I-07     | 0.00580 | 0.00580   | 0.00668    | 0.00000   | 0.00029    | 0.00058   | 0.00058     | 0.00000 | 0.00029 | 0.00347 | 0.00058       | 0.00000 | 0.00087    | 0.00551  |           |            |         |         |         |         |
| Zhenshan97    | 0.00000 | 0.00000   | 0.00564    | 0.00504   | 0.00524    | 0.00544   | 0.00544     | 0.00582 | 0.00524 | 0.00231 | 0.00544       | 0.00580 | 0.00564    | 0.00020  | 0.00580   |            |         |         |         |         |
| Hap1          | 0.00532 | 0.00532   | 0.00656    | 0.00061   | 0.00082    | 0.00020   | 0.00020     | 0.00058 | 0.00082 | 0.00406 | 0.00020       | 0.00058 | 0.00041    | 0.00511  | 0.00058   | 0.00532    |         |         |         |         |
| Hap2          | 0.00061 | 0.00061   | 0.00594    | 0.00491   | 0.00511    | 0.00532   | 0.00532     | 0.00554 | 0.00511 | 0.00319 | 0.00532       | 0.00552 | 0.00553    | 0.00082  | 0.00552   | 0.00061    | 0.00511 |         |         |         |
| Hap3          | 0.00082 | 0.00082   | 0.00553    | 0.00491   | 0.00512    | 0.00532   | 0.00532     | 0.00554 | 0.00512 | 0.00203 | 0.00532       | 0.00552 | 0.00553    | 0.00061  | 0.00552   | 0.00082    | 0.00512 | 0.00122 |         |         |
| Hap4          | 0.00471 | 0.00471   | 0.00594    | 0.00041   | 0.00061    | 0.00082   | 0.00082     | 0.00029 | 0.00061 | 0.00319 | 0.00082       | 0.00029 | 0.00102    | 0.00450  | 0.00029   | 0.00471    | 0.00061 | 0.00491 | 0.00450 |         |
| Hap5          | 0.00574 | 0.00574   | 0.00204    | 0.00594   | 0.00615    | 0.00636   | 0.00636     | 0.00613 | 0.00615 | 0.00552 | 0.00636       | 0.00612 | 0.00656    | 0.00553  | 0.00611   | 0.00574    | 0.00615 | 0.00553 | 0.00533 | 0.00595 |

**Table S4. Primers for KASP genotyping of different alleles of *Waxy* and *ALK***

| KASP marker | Allele | Polymorphic site | Primer name  | Primer sequence (5'–3')                          |
|-------------|--------|------------------|--------------|--------------------------------------------------|
| Wx-SNP1     | C/T    | In1-1            | Wx-SNP1-Fam  | gaaggtgaccaagttcatgctTCATCAGGAAGAACATCTGCAAGG    |
|             |        |                  | Wx-SNP1-Hex  | gaaggtcggagtcaacggattTCATCAGGAAGAACATCTGCAAGT    |
|             |        |                  | Wx-SNP1-Com  | GCCCAACACCTTACAGAAATTAGCA                        |
| Wx-SNP2     | G/23bp | Ex2-112          | Wx-SNP2-Fam  | gaaggtgaccaagttcatgctTTCCAGGGCCTCAAGCCCC         |
|             |        |                  | Wx-SNP2-Hex  | gaaggtcggagtcaacggattGTTCCAGGGCCTCAAGCCCA        |
|             |        |                  | Wx-SNP2-Com  | CGCTGGTCGTCACGCTGA                               |
| Wx-SNP3     | G/A    | Ex4-53           | Wx-SNP3-Fam  | gaaggtgaccaagttcatgctGAGGTTTTTCCATTGCTACAAGCG    |
|             |        |                  | Wx-SNP3-Hex  | gaaggtcggagtcaacggattGAGGTTTTTCCATTGCTACAAGCA    |
|             |        |                  | Wx-SNP3-Com  | TAATGATGACTCCACCTTCTCCAG                         |
| Wx-SNP4     | A/G    | Ex4-77           | Wx-SNP4-Fam  | gaaggtgaccaagttcatgctGTCGACCGTGTGTTCATCGA        |
|             |        |                  | Wx-SNP4-Hex  | gaaggtcggagtcaacggattGTCGACCGTGTGTTCATCGG        |
|             |        |                  | Wx-SNP4-Com  | CAAACCTGAAATCACCAGTGGAAG                         |
| Wx-SNP5     | A/C    | Ex6-62           | Wx-SNP5-Fam  | gaaggtgaccaagttcatgctTCTTGAGATCAATTGTAACCTCACCAT |
|             |        |                  | Wx-SNP5-Hex  | gaaggtcggagtcaacggattTCTTGAGATCAATTGTAACCTCACCAG |
|             |        |                  | Wx-SNP5-Com  | GCTCCTAGGATCCTAAACCTCAAC                         |
| Wx-SNP6     | C/T    | Ex10-115         | Wx-SNP6-Fam  | gaaggtgaccaagttcatgctCTGGAGGAACAGAAGGGCC         |
|             |        |                  | Wx-SNP6-Hex  | gaaggtcggagtcaacggattCTGGAGGAACAGAAGGGCT         |
|             |        |                  | Wx-SNP6-Com  | GAAGAACGATCTGGACGTCCTC                           |
| ALK-SNP1    | A/G    | Ex8-733          | ALK-SNP2-Fam | gaaggtgaccaagttcatgctGAACGGGTCGAACGCCGACAT       |
|             |        |                  | ALK-SNP2-Hex | gaaggtcggagtcaacggattACGGGTCGAACGCCGACAC         |
|             |        |                  | ALK-SNP2-Com | GTCGGCGGGCTGAGGGACA                              |
| ALK-SNP2    | GC/TT  | Ex8-864/865      | ALK-SNP4-Fam | gaaggtgaccaagttcatgctGACATGCCGCGCACCTGGAA        |
|             |        |                  | ALK-SNP4-Hex | gaaggtcggagtcaacggattACATGCCGCGCACCTGGAG         |
|             |        |                  | ALK-SNP4-Com | GCCTCGAGACGTACCGCAAGTA                           |
